# Supplementary material for: An early Cambrian agglutinated tubular lophophorate with brachiopod characters
Source: PubMed Central journal article supplement — Sci Rep. 2014 May 15;4:4682. doi: 10.1038/srep04682 (PMC4021322; doi:10.1038/srep04682), 2014-05-15
Supplement: srep04682-s1.pdf [file srep04682-s1.pdf]

## **SUPPLEMENTARY INFORMATION (SI)**

### **An early Cambrian agglutinated tubular lophophorate with brachiopod characters**

Z.-F. Zhang<sup>1,2\*</sup>, G.-X. Li<sup>2</sup>, L. E. Holmer<sup>3</sup>, G. A. Brock<sup>4</sup>, U. Balthasar<sup>5</sup>, C. B. Skovsted<sup>6</sup>, D.-J. Fu<sup>1</sup>, X.-L. Zhang<sup>1</sup>, H.-Z. Wang<sup>3</sup>, A. Butler<sup>3</sup>, Z.-L. Zhang<sup>1</sup>, C.-Q. Cao<sup>2</sup>, J. Han<sup>1</sup>, J.-N. Liu<sup>1</sup> & D.-G. Shu<sup>1</sup>

<sup>1</sup>Early Life Institute, State Key Laboratory of Continental Dynamics and Department of Geology, Northwest University, Xi'an, 710069, China.

<sup>2</sup>LPS, Nanjing Institute of Geology and Palaeontology, Chinese Academy of Sciences, Nanjing, 210008, China.

<sup>3</sup>Uppsala University, Department of Earth Sciences, Palaeobiology, Villavägen 16, SE-752 36 Uppsala, Sweden.

<sup>4</sup>Department of Biological Sciences, Macquarie University, Sydney, New South Wales 2109, Australia.

<sup>5</sup>University of Glasgow, Department of Geographical and Earth Sciences, Gregory Building, Lilybank Gardens, G12 8QQ, Glasgow, United Kingdom.

<sup>6</sup>Department of Palaeobiology, Swedish Museum of Natural History, Box 50007, SE-104 05 Stockholm, Sweden.

**To whom correspondence should be addressed.**

E-mail: [elizf@nwu.edu.cn](mailto:elizf@nwu.edu.cn) or [zhangle@126.com](mailto:zhangle@126.com) (Z.F.Z)

**Taxonomic remarks on *Yuganotheca*.** *Yuganotheca* is an abundant component in the Chengjiang fauna. It occurs in at least 10 localities in Chengjiang, Jinning, Anning counties and as well as in Haikou southwest of Kunming (Fig. S1), suggesting that *Yuganotheca* was a generalist adapted to a range of environmental settings in early Cambrian marine environments. Due to its typical occurrence as fragmented yellowish-brown arenaceous pieces, even in large clusters on single slabs (Fig. S2), *Yuganotheca* did not attract attention of Chengjiang research scientists<sup>1-4</sup> until the specimens with pedicles were recovered<sup>5,6</sup>. Nevertheless, this bizarre animal has not formally been described up to this point. In earlier publications<sup>5-7</sup>, *Y. elegans* was informally referred to as “*Wangyuia chengjiangensis* Jin et al. 2004”, but the genus name was found to be preoccupied by a Silurian orthid<sup>8</sup>; “*Wangyuia chengjiangensis*” has never been formally established and therefore represents a *nomen nudum*.

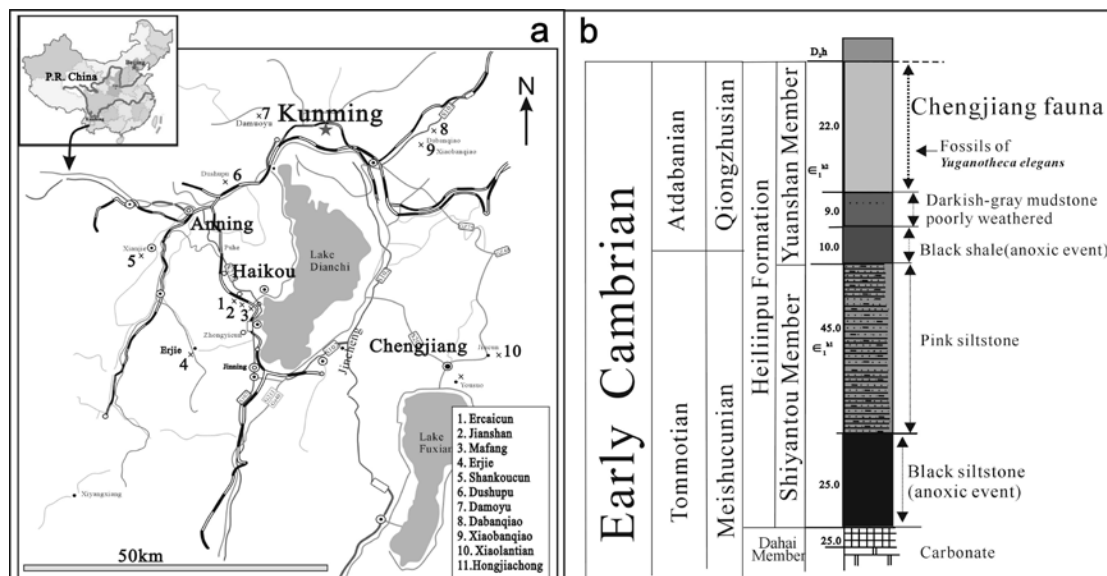

**Figure S1. a**, map showing localities where *Yuganotheca elegans* gen. et sp. nov. has been collected. **b**, stratigraphic column showing the mud-rich deposits yielding the Chengjiang fauna including *Y. elegans* in the Jianshan section at Haikou, Kunming, China. The map image and stratigraphic column was created using CorelDraw 9.0 and converted to TIF format by Z. Zhang.
